1 **Urban birdsongs: higher minimum song frequency of an urban colonist persists**  
2 **in a common garden experiment**

3

4

5 Dustin G. Reichard<sup>1,2</sup>, Jonathan W. Atwell<sup>2</sup>, Meelyn M. Pandit<sup>2,3</sup>, Gonçalo C. Cardoso<sup>4,5</sup>,

6 Trevor D. Price<sup>6</sup> and Ellen D. Ketterson<sup>2</sup>

7

8

9 *<sup>1</sup>Dept. of Zoology, Ohio Wesleyan University; <sup>2</sup>Dept. of Biology, Indiana University;*

10 *<sup>3</sup>Dept. of Biology, University of Oklahoma; <sup>4</sup>CIBIO-InBIO, University of Porto, Portugal;*

11 *<sup>5</sup>Dept. of Biology, University of Copenhagen; <sup>6</sup>Dept. of Ecology and Evolutionary*

12 *Biology, University of Chicago*

13

14

15

16

17

18

19 **Keywords (3-6):** urbanization, acoustic communication, dark-eyed junco, song learning,

20 **cultural evolution, anthropogenic noise**

21 **Abstract**

22 Environmental changes caused by urbanization and noise pollution can have profound  
23 effects on acoustic communication. Many organisms use higher sound frequencies in  
24 urban environments with low-frequency noise, but the developmental and evolutionary  
25 mechanisms underlying these shifts are less clear. We used a common garden  
26 experiment to ask whether changes in minimum song frequency observed 30 years  
27 after a songbird colonized an urban environment are a consequence of behavioral  
28 flexibility or canalized changes that occur early in development. We captured male  
29 juvenile dark-eyed juncos (*Junco hyemalis thurberi*) from two recently diverged  
30 populations (urban and mountain) soon after they reached independence (aged 25-40  
31 days), raised them in identical indoor aviaries, and studied their songs at an age of  
32 three years. We found that the large population difference in minimum frequency  
33 observed in the field persisted undiminished in the common garden despite the absence  
34 of noise. We also found some song sharing between the common garden and natal field  
35 populations, indicating that early song memorization before capture could contribute to  
36 the persistent song differences in adulthood. These results are the first to show that  
37 frequency shifts in urban birdsong are maintained in the absence of noise by genetic  
38 evolution and/or early life experiences.

39

40

41

42

## 43 **Introduction**

44 Anthropogenic noise can alter the biology of diverse animal taxa at organismal,  
45 population, and even community scales [1-7]. In particular, the low frequency  
46 background noise often associated with urbanization can interfere with animal  
47 communication and has been associated with changes in acoustic signals that improve  
48 sound transmission [8, 9]. One such change that is widely observed in urban  
49 environments is increased minimum frequency of acoustic signals, which may be an  
50 adaptation to overcome the masking effects of low-frequency noise [10-16]. Our  
51 understanding of the developmental and evolutionary mechanisms that may underlie  
52 such changes in acoustic signaling remains limited [9, 17-22]. Species such as oscine  
53 songbirds that learn their songs are of particular interest due to the potential for cultural  
54 evolution and other forms of behavioral plasticity, which can facilitate rapid change in  
55 response to anthropogenic noise [23-25].

56 Several non-mutually exclusive hypotheses have been proposed to explain  
57 changes in song frequency in urban environments [9, 26], including short-term plasticity,  
58 ontogenetic effects (early experience), and evolutionary change across generations.  
59 The plasticity hypothesis argues that frequency shifts are the result of behavioral  
60 flexibility in response to the presence or absence of a noise stimulus. Some studies in  
61 oscine songbirds have found evidence supporting plasticity either through rapid  
62 increases in minimum song frequency [18, 22, 27, 28] or switching to song types with  
63 higher minimum frequencies when noise is present [17]. However, evidence from other  
64 songbird species has indicated that short-term plasticity in response to noise does not  
65 always explain the frequency shifts present in urban birdsong [20, 29-32].

66           The early experience hypothesis argues that the presence of noise during  
67 development affects song structure and production later in life. For example, evidence  
68 from black-capped chickadees (*Poecile atricapillus*) and white-crowned sparrows  
69 (*Zonotrichia leucophrys*) suggests that experiencing noise early in life may be  
70 necessary for the development of noise-induced plasticity in song frequency in  
71 adulthood [33, 34]. In addition to inducing plasticity, noise during development may  
72 mask lower frequency tutor songs and cause selective learning of songs with higher  
73 minimum frequencies in urban environments [35]. Evidence suggests that some species  
74 preferentially learn songs that are less degraded by environmental transmission [36, 37;  
75 but see 19]. Notably, a recent study in white-crowned sparrows found that males  
76 developing in an environment with low-frequency noise preferentially learned higher  
77 frequency (less masked) songs [21]. Collectively, these results indicate that ontogenetic  
78 effects of experiencing noise during early life may affect song frequency in adulthood by  
79 the preferential learning of certain songs (i.e. cultural selection), or by developing the  
80 ability for plastic adjustments to noise.

81           Finally, the evolutionary change hypothesis argues that natural or sexual  
82 selection or drift on relevant genetic variation influences song frequency across  
83 generations [9, 26]. In this case, the likely selective pressure is the masking of low-  
84 frequency songs by anthropogenic noise, making those songs less adaptive (e.g. less  
85 effective signals for territoriality and mate attraction) [21]. As a result, individuals with  
86 cognitive, morphological, or sensory phenotypes that cause them to learn and/or  
87 produce higher frequency songs will have higher fitness leading to directional selection  
88 [38]. The colonization of urban environments is associated with a diverse array of

89 phenotypic divergence, such as changes in body size [39, 40], bill morphology [41], and  
90 neural architecture [42], some of which is likely to be genetic, and all of which may  
91 contribute to evolution in song structure.

92         Here, we used a common garden experiment to test predictions of these  
93 hypotheses. Common garden experiments are a powerful method for differentiating  
94 between the relative effects of genetic and environmental factors in determining  
95 phenotypic differences. The only common garden study of divergence in urban acoustic  
96 signals thus far used a species of grasshopper (*Chorthippus biguttulus*) [14]. In that  
97 study, individuals originating from noisy environments sang at significantly higher  
98 minimum frequencies than individuals from quiet environments, but individuals reared in  
99 a noisy common garden environment produced higher frequency songs as adults  
100 regardless of their population of origin. Collectively, these results suggest roles for both  
101 evolutionary change and early noise exposure in determining the differences in song  
102 frequency of urban populations. It is not known whether a similar interplay of  
103 evolutionary and ontogenetic effects applies to birdsong, which can be learned  
104 culturally, and should show much greater plasticity in response to noise than the  
105 stridulatory songs of insects [43].

106         We studied an urban population of dark-eyed juncos (*Junco hyemalis thurberi*)  
107 that was recently established in the early 1980s [44, 45]. This population ceased  
108 migrating and rapidly diverged in a variety of behavioral, hormonal, and life-history traits  
109 from an ancestral, migratory population that breeds in a wildland environment in the  
110 inland mountains and migrates to the coast during the winter [19, 46, 47]. The urban  
111 and mountain acoustic environments differ strongly, including in anthropogenic noise,

112 which is negligible in the mountains [48], and urban juncos sing at significantly higher  
113 minimum frequencies (ca. 0.5 kHz higher) than juncos in the mountain population [19,  
114 48, 49]. If the higher minimum frequency observed in the urban population is caused by  
115 behavioral flexibility in song production (plasticity), then the population difference should  
116 disappear in the common garden. Alternatively, if the population difference is  
117 genetically-based or is affected by early experience, including song learning, then the  
118 population difference should persist in the common garden. To assess whether early  
119 song learning can account for population differences in the common garden, we  
120 compared song types of the common garden birds to songs from their natal populations,  
121 searching for cases of song sharing.

122

## 123 **Methods**

124 The details of our study populations and the common garden experiment are  
125 reported elsewhere [46, 47]. Briefly, we studied two populations of dark-eyed juncos  
126 (*Junco hyemalis thurberi*) in San Diego County, California, USA. The urban population  
127 was located at the University of California, San Diego (hereafter “urban”; elevation 30  
128 m; lat. 32°52’N, long. 117°10’W) and the wildland population was located at Laguna  
129 Mountain Recreational Area (hereafter “mountain”; elevation 1,700 m; lat. 32°52’N, long.  
130 116°25’W). In July 2007, we captured 80 independent, juvenile juncos (day 25-40 post-  
131 hatch as determined by prior banding in the nest for most subjects, see [47]) from the  
132 urban and mountain populations (20 per sex per population). The birds were  
133 transported to Indiana University in Bloomington, Indiana, USA, and housed in mixed  
134 sex flocks in separate but identical indoor aviaries (6.4 x 3.2 x 2.4 m) with light

135 conditions that mimicked seasonal shifts in their native ranges [47]. The two populations  
136 were acoustically isolated from one another such that males could only hear and  
137 interact with members of their own population. The current study took place in May  
138 2010, which was the third spring that these males experienced in the common garden.

139

#### 140 *Song Recordings*

141 Dark-eyed juncos produce a loud, broadcast song consisting of a simple trill  
142 (rapid repetition of the same element), and each male sings a small repertoire of distinct  
143 song types (Fig. 1; [50]). To record songs, we isolated each surviving male from the  
144 common garden (mountain,  $N = 10$ ; urban,  $N = 8$ ) in a (45.7 x 45.7 x 45.7 cm) cage with  
145 a single perch extended across its center and access to food and water *ad libitum*. An  
146 Audio-Technica shotgun microphone (Model AT835b) was suspended ~30 cm above  
147 the center of the cage's perch and connected to a Marantz digital recorder (Model  
148 PMD660). We recorded each male for three hours using a 44.1 kHz sampling rate in  
149 uncompressed WAV format. One mountain male did not sing and was excluded from  
150 the analysis.

151 Junco song types can be reliably distinguished by visual comparisons of  
152 spectrograms [49, 51, 52]. Assignments of song types and song type sharing were  
153 performed blindly without any knowledge of the population of origin and were confirmed  
154 by at least two independent observers. We recorded 17 different song types from the  
155 mountain population, some of which were shared by more than one bird (see Results),  
156 and 28 different song types from the urban population, some also shared. Mountain  
157 males sang an average of 3 song types (range: 1-5), and urban males sang an average

158 of 4.9 song types (range: 2-7). We also compared these songs to a catalog of song  
159 types from both field populations collected in 2006 and 2007 (mountain,  $N = 115$ ; urban,  
160  $N = 168$ ; [19]) to assess sharing between the common garden males and their natal  
161 populations.

162

### 163 *Song Measurements*

164 We used Raven Pro 1.4 [53] to measure minimum, maximum, and peak  
165 frequency. Measurements were performed by the same observer (MPP) who was blind  
166 to population of origin to avoid bias. For each combination of song type and male, we  
167 randomly selected a representative exemplar and generated a spectrogram (Hann  
168 Window, 512 DFT, 86.1 Hz frequency resolution, 5.8 ms time resolution). We used the  
169 cursor to visually draw a “selection box” around each song type, bounded by the  
170 perceived start and end time as well as the minimum and maximum frequency. We  
171 recorded the minimum and maximum frequencies of these visual measurements from  
172 the spectrogram, and also recorded the peak frequency of the selection (frequency with  
173 the highest cumulative amplitude).

174 Visual measurements from spectrograms have been criticized as a potentially  
175 biased technique for determining minimum and maximum frequency [54-57]. Instead,  
176 researchers have advocated using the power spectrum and a threshold value as a more  
177 objective alternative. To assess potential differences in these techniques, we also  
178 measured minimum and maximum frequency from the power spectrum of each song  
179 using a threshold of minus 30 dB relative to the peak frequency of the song. Minimum  
180 and maximum frequency were defined as the points of intersection between the power-



181 spectrum curve and the threshold value [55, 58]. We were able to use a very large  
182 amplitude threshold (minus 30 dB) because of the high signal-to-noise ratio in our aviary  
183 recordings. Nonetheless, in a few song types, faint harmonics caused power-spectrum  
184 measurements of maximum frequency far exceeding the highest fundamental frequency  
185 observed on the spectrogram and the normal range of maximum frequencies measured  
186 in various field studies [50]. Similarly, there was one song type where the power-  
187 spectrum measurement of minimum frequency resulted in a value that was much higher  
188 than the lowest observed frequency. We excluded those cases ( $N = 1$ , minimum  
189 frequency;  $N = 10$ , maximum frequency) from any analyses involving the power-  
190 spectrum measurements for maximum frequency.

191 All raw frequency measurements were  $\log_{10}$  transformed before further analysis,  
192 because perception and modulation of sound frequency both function on a ratio scale  
193 [59]. Log transformation facilitates the comparison of frequency differences across  
194 different frequency ranges; otherwise, differences in maximum or peak frequency would  
195 be over-estimated compared to differences in minimum frequency.

196 Across all measurements of minimum frequency, the visual measurements from  
197 spectrograms and threshold measurements from power spectra were significantly  
198 correlated ( $r = 0.79$ ,  $N = 64$ ,  $P < 0.001$ ; Fig. S1A), and there was only a slight, but  
199 statistically significant difference in their means ( $0.028 \log_{10}\text{Hz}$  [168.7 Hz];  $t_{63} = -3.49$ ,  $P$   
200  $< 0.001$ ; Figure S1). Maximum frequency measurements were also correlated across  
201 methods ( $r = 0.96$ ,  $N = 55$ ,  $P < 0.001$ ; Fig. S1B), and their means did not differ  
202 significantly ( $t_{54} = -1.85$ ,  $P = 0.07$ ; Fig. S2). In the main text, we only report analyses  
203 using visual frequency measurements from spectrograms to facilitate a comparison with

204 a dataset of field recordings previously analyzed in this manner [see above; 19]. In the  
205 supplementary material we report alternative comparisons between the common garden  
206 populations using threshold measurements from power spectra (Tables S1 and S3),  
207 which yielded identical results to those reported in the main text.

208

### 209 *Statistical Analysis*

210 To compare acoustic traits between populations in the common garden, we  
211 conducted linear mixed models (LMM) using the lme4 package in R version 3.5.2 [60,  
212 61]. Each model contained a song measurement as the response variable, population of  
213 origin as an independent factor, and song type as a random factor. Song types were  
214 used as a random factor in the main text, rather than male identity, because junco song  
215 traits are a property of the individual song type (high within-type repeatability across  
216 males) rather than a property of the individual males [low repeatability across song  
217 types in the repertoire of individual males; 49]. In the supplementary material we report  
218 identical analyses using male identity as a random effect, instead of song type, and our  
219 results remain unchanged (Tables S2, S3).

220 To assess whether early song learning in the natal urban environment, as  
221 opposed to songs that developed later in the common garden, was important to  
222 maintain high minimum song frequency in urban-captured males, we compared the  
223 minimum frequency of song types shared with urban field recordings and song types not  
224 shared with field recordings. Since junco song development is strongly influenced by  
225 social learning and by creating novel song types (see below; reviewed in [50]),  
226 comparing shared and non-shared song types can test whether social learning

227 influences acoustic traits in a particular direction [62]. We used a LMM with minimum  
228 frequency as the dependent variable, song type as a random factor and whether song  
229 types were shared or not with urban field recordings as an independent factor. Finally,  
230 we used *t*-tests to compare frequency measurements from the common garden with  
231 those from a previously published field study of both populations [see above; 19].

232

## 233 **Results**

234 We identified 7 song types (out of 17 total song types; 41%) that were shared  
235 between two or more mountain-captured males in the common garden, and 8 song  
236 types (out of 28; 29%) that were shared between two or more urban-captured males.  
237 Three song types were shared between populations in the common garden (Fig. 1). We  
238 also identified 2 song types from the mountain-captured males (out of 17; 12%) that had  
239 been previously recorded from mountain males in the field (out of 115 song types  
240 recorded in the field), and 6 song types from the urban-captured males (out of 28; 21%)  
241 that had been previously recorded from urban males in the field (out of 168 song types  
242 recorded in the field).

243 In the common garden, males that were captured in the urban population sang  
244 with significantly higher minimum frequencies than mountain-captured males ( $t = 3.59$ ,  
245  $P < 0.001$ ; Fig. 2 and examples in Fig. 1). In contrast, we found no detectable  
246 differences between the common garden populations in maximum ( $t = -0.38$ ,  $P = 0.71$ )  
247 or peak frequency (spectrogram:  $t = 0.31$ ,  $P = 0.75$ ).

248 For urban-captured males, the minimum frequency of song types shared with  
249 recordings from the urban field site ( $\bar{x} = 3.434 \log_{10}\text{Hz}$  [2761.2 Hz],  $N = 10$  song types)

250 did not differ from that of song types not found in field recordings ( $\bar{x} = 3.437 \log_{10}\text{Hz}$   
251 [2761.6 Hz],  $N = 18$  song types;  $t = -1.11$ ,  $P = 0.27$ ). In fact, the means for the minimum  
252 frequency of song types were almost identical between those shared and not shared  
253 with the urban field recordings ( $\bar{x}$  difference =  $0.0029 \log_{10}\text{Hz}$  [0.38 Hz]).

254 Compared to field recordings from their respective populations, common garden  
255 males sang with significantly lower minimum frequencies (mountain,  $t_{16.7} = -4.33$ ,  $P <$   
256  $0.001$ ; urban,  $t_{36.4} = -8.08$ ,  $P < 0.001$ ; Fig. 3A). In contrast, mountain-captured males  
257 sang at significantly higher maximum frequencies in the common garden when  
258 compared to field recordings of mountain males ( $t_{17.9} = 2.44$ ,  $P = 0.03$ ; Fig. 3C), but they  
259 did not differ in peak frequency ( $t_{18.4} = 1.66$ ,  $P = 0.11$ ; Fig. 3B). The maximum frequency  
260 of urban-captured males did not differ statistically from field recordings of urban males  
261 ( $t_{31} = 1.65$ ,  $P = 0.10$ ; Fig. 3C), but they did sing at significantly higher peak frequencies  
262 ( $t_{32.4} = 2.48$ ,  $P = 0.02$ ; Fig. 3B).

263

## 264 Discussion

265 Mirroring differences observed in the field [19], urban male juncos captured early  
266 in life sing at significantly higher minimum frequencies than mountain-captured juncos  
267 when both are held in a quiet, common garden environment. This result supports the  
268 prediction of the early experience and evolutionary change hypotheses and indicates  
269 that the higher minimum frequency of the urban junco population is established early in  
270 life, through genetic and/or cultural mechanisms, rather than occurring as a result of  
271 behavioral plasticity in response to noise. No significant differences were found in  
272 maximum or peak frequency between the two populations in the common garden,

273 indicating that acoustic adaptation in the urban population has acted predominantly on  
274 minimum frequency rather than on the frequency of the entire song. We also identified  
275 multiple shared songs between the common garden and natal field populations,  
276 indicating that early song learning from tutors in the field before capture could contribute  
277 to the differences observed in the common garden.

278         The songs of oscine birds develop through a combination of cultural transmission  
279 and genetically-based influences on the morphology and physiology of the vocal  
280 production apparatus, on the auditory system, and on learning preferences [63, 64].  
281 While genetic evolution relies on selection or drift acting on standing genetic variation  
282 and random mutations, cultural evolution allows for selectively learning pre-existing  
283 memes (i.e. cultural selection) or generating novel memes [i.e. cultural mutation] in a  
284 non-random, adaptive way [19]. For example, white-crowned sparrows in noisy  
285 environments were shown to preferentially learn higher frequency songs and also to  
286 elevate the frequency of the learned songs above those of their tutor [21]. A similar  
287 combination of cultural selection and cultural mutation has been inferred for urban dark-  
288 eyed juncos based on population comparisons of song type meme pools [19].

289         As in other songbirds, dark-eyed juncos partially rely on conspecific tutors early  
290 in life to develop species-typical songs [65], but the exact duration of this sensitive  
291 period for song learning is not known. We observed some song type sharing between  
292 the common garden birds and field recordings from their natal populations, suggesting  
293 that song learning occurred in the field before capture at around 25 to 40 days of age.  
294 This timeframe is consistent with the timing of the sensitive period in other closely-  
295 related sparrows [66, 67]. However, the majority of song types in both common garden

296 populations were not shared with any known field tutors despite our extensive catalog of  
297 field recordings, particularly in the spatially-confined, urban population [19]. In addition  
298 to cultural transmission from adult tutors, dark-eyed juncos are known to experience  
299 frequent cultural mutations in the form of modifications to learned song types [i.e.  
300 improvisation, 68] or *de novo* creation of new song types (i.e. invention, [68]; reviewed  
301 in [50]). These frequent cultural mutations likely explain the low incidence of song  
302 sharing between the common garden and field populations.

303         We also observed frequent song sharing among common garden males (41% of  
304 song types for the mountain-captured birds, and 29% for the urban-captured) at a much  
305 higher rate than typically found in the field, where most neighboring males do not share  
306 song types [50-52]. This disparity suggests that much of the song development in the  
307 common garden was strongly influenced by peers rather than by adult tutors in the field  
308 before capture. The importance of peer interactions is consistent with a previous  
309 experiment that showed that when young dark-eyed juncos are reared together without  
310 adult tutors they are stimulated to create novel sounds (cultural innovation), copy them  
311 from each other, and modify them (cultural improvisation) into a species-typical song  
312 [65]. This type of cultural mutation would likely be biased towards higher frequencies if it  
313 occurred in a noisy urban environment [19, 21], but our common garden environment  
314 was quiet, and, therefore, the direction of this type of cultural mutation should be  
315 random or even biased towards low frequencies. Accordingly, we found that juncos from  
316 both populations in the common garden sang at significantly lower minimum  
317 frequencies than field recordings from their natal populations. This difference between

318 the field and common garden juncos suggests some plasticity in song development,  
319 likely related to the quieter acoustic environment in the common garden.

320         Importantly, all of the changes in song from the wild to the common garden  
321 (lower minimum frequencies, learning from peers) did not erode the population  
322 difference in minimum frequency. The difference in minimum song frequency between  
323 mountain- and urban-captured birds in the common garden was large (417 Hz), and  
324 close to the difference reported between the wild populations (540 Hz; [19]). This  
325 outcome suggests that the two populations now differ genetically in traits that influence  
326 minimum song frequency, thus maintaining the population difference even in the face of  
327 an overall decrease in minimum frequency by both common garden populations. The  
328 divergent traits that may be responsible for the persistent population difference could be  
329 cognitive, such as learning or singing preferences (e.g. the genetic song template [63,  
330 69-71]), or even anatomical or physiological traits that affect song production (e.g. body  
331 size [39, 72], or bill morphology [41]). Morphologically-mediated population differences  
332 in sound frequency are perhaps less likely because, although urban juncos are slightly  
333 smaller than mountain juncos, there is no detectable relationship between body size  
334 and song frequency in either of our field populations [73]. Whether the genetic song  
335 template or other aspects of neuroanatomy have diverged between the urban and  
336 mountain juncos is unknown and represents an intriguing direction for future research.

337         The mechanisms underlying the evolutionary change and early experience  
338 hypotheses are not mutually exclusive and may even reinforce each other. For  
339 example, besides the difference in minimum song frequency, the urban junco population  
340 studied here also diverged in morphological, reproductive and endocrinological traits

341 [44-47, 74]. Some of these traits appear to have changed by a combination of  
342 phenotypic plasticity, which provides an immediate and approximate adaptation to the  
343 urban environment, and then selection causing genetic assimilation and the adjustment  
344 of the plastic response [47, 75]. Song traits, including minimum frequency, are also  
345 likely to undergo such synergy of plasticity and selection. Initially, behavioral flexibility  
346 can change songs to provide an immediate reduction of masking by noise [17, 22, 28],  
347 and this plasticity simultaneously creates cultural models for which genetically-based  
348 learning preferences may be selected upon. Interestingly, song types of urban-captured  
349 males that were shared with field recordings, and thus likely to have been memorized  
350 from tutors in the urban environment, had an identical average minimum frequency to  
351 the unshared song types, many of which would have developed later in the common  
352 garden. This result suggests that cultural learning early in life is not the most important  
353 explanation for the persistent population difference in song frequency. Instead, around  
354 30 years after colonization of the urban environment [44, 45], it seems likely that the  
355 population difference in song frequency is already substantially genetically ingrained.

356 Broadly, our results suggest that urban environments, and particularly urban  
357 noise, may drive the evolution of higher minimum frequencies through a combination of  
358 cultural and genetic changes. The urban junco population studied here experienced one  
359 of the largest documented increases in minimum song frequency in less than 30 years,  
360 indicating that if evolutionary changes are the primary driver, they can happen relatively  
361 rapidly [19, 48]. Although behavioral flexibility may provide an immediate escape from  
362 masking by environmental noise [17, 22, 28], a combination of cultural evolution and  
363 genetic selection on song-related traits can potentially drive more permanent shifts in



364 minimum frequency in chronically noisy environments [20]. The juncos in this study  
365 experienced less than 40 days of life with adult song tutors and the noise present in  
366 their natal environments, which also suggests that possible developmental mechanisms  
367 were triggered in very early life (e.g. memorization of song types, experiencing noise)  
368 and had lasting effects. It remains unclear whether the persistent frequency differences  
369 between the urban and mountain juncos are driven by experience related changes in  
370 song, such as cultural transmission or experiencing noise early in life, or by genetic  
371 divergence in traits that influence song learning or production. Future work can begin to  
372 disentangle these effects by cross-fostering or hand rearing young birds from urban and  
373 wildland environments and tutoring with a wide range of song frequencies.

374

## 375 **Acknowledgments**

376 We thank R. Kiley for assistance with collecting song recordings and H. Hoekstra, R.  
377 Lande, K. Marchetti, and the Descanso Ranger District of the Cleveland National Forest  
378 for logistical support at field sites.

379

## 380 **Funding**

381 This work was funded by the National Science Foundation (Graduate Research  
382 Fellowship Program; DEB- 0808284; IOS-0820055; IOS-1011145; DBI-0939454),  
383 National Institutes of Health (T32HD49336), Fundação para a Ciência e a Tecnologia  
384 (reference DL57/2016/CP1440/CT0011), Indiana University, Ohio Wesleyan University,  
385 and University of Oklahoma.

386 **Literature Cited**

- 387 1. Francis, C.D., et al., *Noise pollution alters ecological services: enhanced*  
388 *pollination and disrupted seed dispersal*. Proceedings of the Royal Society B-  
389 Biological Sciences, 2012. **279**(1739): p. 2727-2735.
- 390 2. Kight, C.R. and J.P. Swaddle, *How and why environmental noise impacts*  
391 *animals: an integrative, mechanistic review*. Ecology Letters, 2011. **14**(10): p.  
392 1052-1061.
- 393 3. Schroeder, J., et al., *Passerine birds breeding under chronic noise experience*  
394 *reduced fitness*. Plos One, 2012. **7**(7).
- 395 4. Slabbekoorn, H., et al., *A noisy spring: the impact of globally rising underwater*  
396 *sound levels on fish*. Trends in Ecology & Evolution, 2010. **25**(7): p. 419-427.
- 397 5. Shannon, G., et al., *A synthesis of two decades of research documenting the*  
398 *effects of noise on wildlife*. Biological Reviews, 2016. **91**(4): p. 982-1005.
- 399 6. Kleist, N.J., et al., *Chronic anthropogenic noise disrupts glucocorticoid signaling*  
400 *and has multiple effects on fitness in an avian community*. Proceedings of the  
401 National Academy of Sciences of the United States of America, 2018. **115**(4): p.  
402 E648-E657.
- 403 7. Cardoso, G.C., Y. Hu, and C.D. Francis, *The comparative evidence for urban*  
404 *species sorting by anthropogenic noise*. Royal Society Open Science, 2018. **5**(2).
- 405 8. Slabbekoorn, H. and E.A.P. Ripmeester, *Birdsong and anthropogenic noise:*  
406 *implications and applications for conservation*. Molecular Ecology, 2008. **17**(1): p.  
407 72-83.

- 408 9. Brumm, H. and H. Slabbekoorn, *Acoustic communication in noise*, in *Advances*  
409 *in the Study of Behavior, Vol 35*. 2005, Elsevier Academic Press Inc: San Diego.  
410 p. 151-209.
- 411 10. Halfwerk, W., et al., *Low-frequency songs lose their potency in noisy urban*  
412 *conditions*. Proceedings of the National Academy of Sciences of the United  
413 States of America, 2011. **108**(35): p. 14549-14554.
- 414 11. Slabbekoorn, H., X.J. Yang, and W. Halfwerk, *Birds and anthropogenic noise:*  
415 *singing higher may matter (a comment on Nemeth and Brumm, "Birds and*  
416 *anthropogenic noise: are urban songs adaptive?")*. American Naturalist, 2012.  
417 **180**(1): p. 142-145.
- 418 12. Slabbekoorn, H. and M. Peet, *Ecology: Birds sing at a higher pitch in urban noise*  
419 *- great tits hit the high notes to ensure that their mating calls are heard above the*  
420 *city's din*. Nature, 2003. **424**(6946): p. 267-267.
- 421 13. Derryberry, E.P., et al., *Patterns of song across natural and anthropogenic*  
422 *soundscapes suggest that white-crowned sparrows minimize acoustic masking*  
423 *and maximize signal content*. Plos One, 2016. **11**(4): p. 17.
- 424 14. Lampe, U., K. Reinhold, and T. Schmoll, *How grasshoppers respond to road*  
425 *noise: developmental plasticity and population differentiation in acoustic*  
426 *signalling*. Functional Ecology, 2014. **28**(3): p. 660-668.
- 427 15. Nemeth, E. and H. Brumm, *Birds and anthropogenic noise: are urban songs*  
428 *adaptive?* American Naturalist, 2010. **176**(4): p. 465-475.
- 429 16. Pohl, N.U., et al., *Great tits in urban noise benefit from high frequencies in song*  
430 *detection and discrimination*. Animal Behaviour, 2012. **83**(3): p. 711-721.

- 431 17. Halfwerk, W. and H. Slabbekoorn, *A behavioural mechanism explaining noise-*  
432 *dependent frequency use in urban birdsong*. *Animal Behaviour*, 2009. **78**(6): p.  
433 1301-1307.
- 434 18. Verzijden, M.N., et al., *Immediate spectral flexibility in singing chiffchaffs during*  
435 *experimental exposure to highway noise*. *Journal of Experimental Biology*, 2010.  
436 **213**(15): p. 2575-2581.
- 437 19. Cardoso, G.C. and J.W. Atwell, *Directional cultural change by modification and*  
438 *replacement of memes*. *Evolution*, 2011. **65**: p. 295-300.
- 439 20. Zollinger, S.A., et al., *Higher songs of city birds may not be an individual*  
440 *response to noise*. *Proceedings of the Royal Society B-Biological Sciences*,  
441 2017. **284**(1860).
- 442 21. Moseley, D.L., et al., *Acoustic adaptation to city noise through vocal learning by a*  
443 *songbird*. *Proceedings of the Royal Society B-Biological Sciences*, 2018.  
444 **285**(1888).
- 445 22. Bermúdez-Cuamatzin, E., et al., *Experimental evidence for real-time song*  
446 *frequency shift in response to urban noise in a passerine bird*. *Biology Letters*,  
447 2011. **7**: p. 36-38.
- 448 23. Rios-Chelen, A.A., et al., *The learning advantage: bird species that learn their*  
449 *song show a tighter adjustment of song to noisy environments than those that do*  
450 *not learn*. *Journal of Evolutionary Biology*, 2012. **25**(11): p. 2171-2180.
- 451 24. Verzijden, M.N., et al., *The impact of learning on sexual selection and speciation*.  
452 *Trends in Ecology & Evolution*, 2012. **27**(9): p. 511-519.

- 453 25. Luther, D.A. and E.P. Derryberry, *Birdsongs keep pace with city life: changes in*  
454 *song over time in an urban songbird affects communication*. *Animal Behaviour*,  
455 2012. **83**(4): p. 1059-1066.
- 456 26. Patricelli, G.L. and J.L. Blickley, *Avian communication in urban noise: Causes*  
457 *and consequences of vocal adjustment*. *Auk*, 2006. **123**(3): p. 639-649.
- 458 27. Bermúdez-Cuamatzin, E., et al., *Strategies of song adaptation to urban noise in*  
459 *the house finch: syllable pitch plasticity or differential syllable use?* *Behaviour*,  
460 2009. **146**: p. 1269-1286.
- 461 28. Goodwin, S.E. and J. Podos, *Shift of song frequencies in response to masking*  
462 *tones*. *Animal Behaviour*, 2013. **85**(2): p. 435-440.
- 463 29. Potvin, D.A. and S.A. MacDougall-Shackleton, *Experimental chronic noise*  
464 *exposure affects adult song in zebra finches*. *Animal Behaviour*, 2015. **107**: p.  
465 201-207.
- 466 30. Potvin, D.A. and R.A. Mulder, *Immediate, independent adjustment of call pitch*  
467 *and amplitude in response to varying background noise by silvereyes (Zosterops*  
468 *lateralis)*. *Behavioral Ecology*, 2013. **24**(6): p. 1363-1368.
- 469 31. Derryberry, E.P., et al., *White-crowned sparrow males show immediate flexibility*  
470 *in song amplitude but not in song minimum frequency in response to changes in*  
471 *noise levels in the field*. *Ecology and Evolution*, 2017. **7**(13): p. 4991-5001.
- 472 32. Rios-Chelen, A.A., et al., *No reliable evidence for immediate noise-induced song*  
473 *flexibility in a suboscine*. *Urban Ecosystems*, 2018. **21**(1): p. 15-25.
- 474 33. LaZerte, S.E., H. Slabbekoorn, and K.A. Otter, *Learning to cope: vocal*  
475 *adjustment to urban noise is correlated with prior experience in black-capped*

- 476            *chickadees*. Proceedings of the Royal Society of London B: Biological Sciences,  
477            2016. **283**(1833).
- 478    34.    Gentry, K.E., et al., *Immediate signaling flexibility in response to experimental*  
479            *noise in urban, but not rural, white-crowned sparrows*. Ecosphere, 2017. **8**(8).
- 480    35.    Lohr, B., T.F. Wright, and R.J. Dooling, *Detection and discrimination of natural*  
481            *calls in masking noise by birds: estimating the active space of a signal*. Animal  
482            Behaviour, 2003. **65**: p. 763-777.
- 483    36.    Peters, S., E.P. Derryberry, and S. Nowicki, *Songbirds learn songs least*  
484            *degraded by environmental transmission*. Biology Letters, 2012.
- 485    37.    Morton, E.S., S.L. Gish, and M. Vandervoort, *On the learning of degraded and*  
486            *undegraded songs in the Carolina wren*. Animal Behaviour, 1986. **34**: p. 815-820.
- 487    38.    Endler, J.A., *Signals, signal conditions, and the direction of evolution*. American  
488            Naturalist, 1992. **139**: p. S125-S153.
- 489    39.    Narango, D.L. and A.D. Rodewald, *Urban-associated drivers of song variation*  
490            *along a rural-urban gradient*. Behavioral Ecology, 2016. **27**(2): p. 608-616.
- 491    40.    Meillere, A., et al., *Growing in a city: Consequences on body size and plumage*  
492            *quality in an urban dweller, the house sparrow (Passer domesticus)*. Landscape  
493            and Urban Planning, 2017. **160**: p. 127-138.
- 494    41.    Giraudeau, M., et al., *Song characteristics track bill morphology along a gradient*  
495            *of urbanization in house finches (Haemorhous mexicanus)*. Frontiers in Zoology,  
496            2014. **11**: p. 8.
- 497    42.    Moller, A.P. and J. Erritzoe, *Brain size and urbanization in birds*. Avian Research,  
498            2015. **6**: p. 7.

- 499 43. Orci, K.M., K. Petroczki, and Z. Barta, *Instantaneous song modification in*  
500 *response to fluctuating traffic noise in the tree cricket *Oecanthus pellucens*.*  
501 *Animal Behaviour*, 2016. **112**: p. 187-194.
- 502 44. Rasner, C.A., et al., *Genetic and morphological evolution following a founder*  
503 *event in the dark-eyed junco, *Junco hyemalis thurberi*.* *Molecular Ecology*, 2004.  
504 **13**: p. 671-681.
- 505 45. Yeh, P.J., *Rapid evolution of a sexually selected trait following population*  
506 *establishment in a novel habitat.* *Evolution*, 2004. **58**(1): p. 166-174.
- 507 46. Yeh, P.J. and T.D. Price, *Adaptive phenotypic plasticity and the successful*  
508 *colonization of a novel environment.* *The American Naturalist*, 2004. **164**(4): p.  
509 531-542.
- 510 47. Atwell, J.W., et al., *Hormonal, behavioral, and life-history traits exhibit correlated*  
511 *shifts in relation to population establishment in a novel environment.* *The*  
512 *American Naturalist*, 2014. **184**(6): p. E147-E160.
- 513 48. Slabbekoorn, H., P. Yeh, and K. Hunt, *Sound transmission and song divergence:*  
514 *a comparison of urban and forest acoustics.* *Condor*, 2007. **109**(1): p. 67-78.
- 515 49. Cardoso, G.C., et al., *Song types, song performance, and the use of repertoires*  
516 *in dark-eyed juncos (*Junco hyemalis*).* *Behavioral Ecology*, 2009. **20**(4): p. 901-  
517 907.
- 518 50. Cardoso, G.C. and D.G. Reichard, *Dark-eyed junco song: linking ontogeny and*  
519 *function with a potential role in reproductive isolation*, in *Snowbird: Integrative*  
520 *biology and evolutionary diversity in the junco*, E.D. Ketterson and J.W. Atwell,  
521 Editors. 2016, University of Chicago Press: Chicago. p. 310-337.

- 522 51. Newman, M.M., P.J. Yeh, and T.D. Price, *Song variation in a recently founded*  
523 *population of the dark-eyed junco (Junco hyemalis)*. *Ethology*, 2008. **114**(2): p.  
524 164-173.
- 525 52. Konishi, M., *Song variation in a population of Oregon juncos*. *Condor*, 1964. **66**:  
526 p. 423-436.
- 527 53. Bioacoustics Research Program, *Raven Pro: Interactive Sound Analysis*  
528 *Software*. 2011, The Cornell Lab of Ornithology: Ithaca, New York.
- 529 54. Brumm, H., et al., *Measurement artefacts lead to false positives in the study of*  
530 *birdsong in noise*. *Methods in Ecology and Evolution*, 2017. **8**(11): p. 1617-1625.
- 531 55. Rios-Chelen, A.A., G.C. Lee, and G.L. Patricelli, *A comparison between two*  
532 *ways to measure minimum frequency and an experimental test of vocal plasticity*  
533 *in red-winged blackbirds in response to noise*. *Behaviour*, 2016. **153**(12): p.  
534 1445-1472.
- 535 56. Cardoso, G.C. and J.W. Atwell, *On amplitude and frequency in birdsong: a reply*  
536 *to Zollinger et al*. *Animal Behaviour*, 2012. **84**(4): p. e10-e15.
- 537 57. Zollinger, S.A., et al., *On the relationship between, and measurement of,*  
538 *amplitude and frequency in birdsong*. *Animal Behaviour*, 2012. **84**(4): p. e1-e9.
- 539 58. Podos, J., *A performance constraint on the evolution of trilled vocalizations in a*  
540 *songbird family (Passeriformes:Emberizidae)*. *Evolution*, 1997. **51**(2): p. 537-551.
- 541 59. Cardoso, G.C., *Using frequency ratios to study vocal communication*. *Animal*  
542 *Behaviour*, 2013. **85**(6): p. 1529-1532.
- 543 60. R Core Team, *R: A language and environment for statistical computing*. 2018, R  
544 Foundation for Statistical Computing: Vienna, Austria.



- 545 61. Bates, D.M., et al., *Package Lme4: linear mixed-effects models using Eigen and*  
546 *S4*. Journal of Statistical Software, 2015: p. 1-48.
- 547 62. Cardoso, G.C. and J.W. Atwell, *Shared songs are of lower performance in the*  
548 *dark-eyed junco*. Royal Society Open Science, 2016. **3**(7).
- 549 63. Fehér, O., et al., *De novo establishment of wild-type song culture in the zebra*  
550 *finch*. Nature, 2009. **459**: p. 564-568.
- 551 64. Podos, J., S.K. Huber, and B. Taft, *Bird song: the interface of evolution and*  
552 *mechanism*. Annual Review of Ecology Evolution and Systematics, 2004. **35**: p.  
553 55-87.
- 554 65. Marler, P., M. Kreith, and M. Tamura, *Song development in hand-raised Oregon*  
555 *juncos*. Auk, 1962. **79**: p. 12-30.
- 556 66. Marler, P. and S. Peters, *A sensitive period for song acquisition in the song*  
557 *sparrow, Melospiza melodia - a case of age-limited learning*. Ethology, 1987.  
558 **76**(2): p. 89-100.
- 559 67. Marler, P. and S. Peters, *Sensitive periods for song acquisition from tape*  
560 *recordings and live tutors in the swamp sparrow, Melospiza georgiana*. Ethology,  
561 1988. **77**(1): p. 76-84.
- 562 68. Beecher, M.D. and E.A. Brenowitz, *Functional aspects of song learning in*  
563 *songbirds*. Trends in Ecology & Evolution, 2005. **20**(3): p. 143-149.
- 564 69. Mundinger, P.C., *Behaviour-genetic analysis of canary song: inter-strain*  
565 *differences in sensory learning, and epigenetic rules*. Animal Behaviour, 1995.  
566 **50**: p. 1491-1511.

- 567 70. Mets, D.G. and M.S. Braind, *Genetic variation interacts with experience to*  
568 *determine interindividual differences in learned song*. Proceedings of the National  
569 Academy of Sciences of the United States of America, 2018. **115**(2): p. 421-426.
- 570 71. Mundinger, P.C. and D.C. Lahti, *Quantitative integration of genetic factors in the*  
571 *learning and production of canary song*. Proceedings of the Royal Society B-  
572 Biological Sciences, 2014. **281**(1781): p. 8.
- 573 72. Ryan, M.J. and E.A. Brenowitz, *The role of body size, phylogeny, and ambient*  
574 *noise in the evolution of bird song*. American Naturalist, 1985. **126**(1): p. 87-100.
- 575 73. Cardoso, G.C., et al., *Song frequency does not reflect differences in body size*  
576 *among males in two oscine species*. Ethology, 2008. **114**(11): p. 1084-1093.
- 577 74. Atwell, J.W., et al., *Boldness behavior and stress physiology in a novel urban*  
578 *environment suggest rapid correlated evolutionary adaptation*. Behavioral  
579 Ecology, 2012. **23**: p. 960-969.
- 580 75. Price, T.D., P.J. Yeh, and B. Harr, *Phenotypic plasticity and the evolution of a*  
581 *socially selected trait following colonization of a novel environment*. The  
582 American Naturalist, 2008. **172**: p. S49-S62.
- 583
- 584
- 585
- 586
- 587
- 588

589 **Figure Captions**

590

591 **Figure 1.** Example spectrograms of shared song types observed between mountain-  
592 and urban-captured males in the common garden. Songs A, C, and E were produced by  
593 mountain males and songs B, D, and F were produced by urban males. The thin line on  
594 each spectrogram marks 3 kHz to highlight frequency shifts between mountain and  
595 urban songs.

596

597 **Figure 2.** Comparison of the minimum, peak, and maximum frequencies of song types  
598 produced by mountain- and urban-captured males raised in a common garden  
599 environment. Each box represents the interquartile range and median, whiskers  
600 represent range of data within 1.5 times the interquartile range, and dots represent data  
601 points exceeding that range.  $**P < 0.001$ .

602

603 **Figure 3.** Comparison of the minimum (A), peak (B), and maximum (C) frequency of  
604 songs produced by mountain and urban males in the field [19] and in a common garden  
605 environment. Boxplots as in Fig. 2. Legend is identical for A-C.  $**P < 0.001$ .  $*P < 0.05$ .

606

607

608

609

610 **Figure 1**

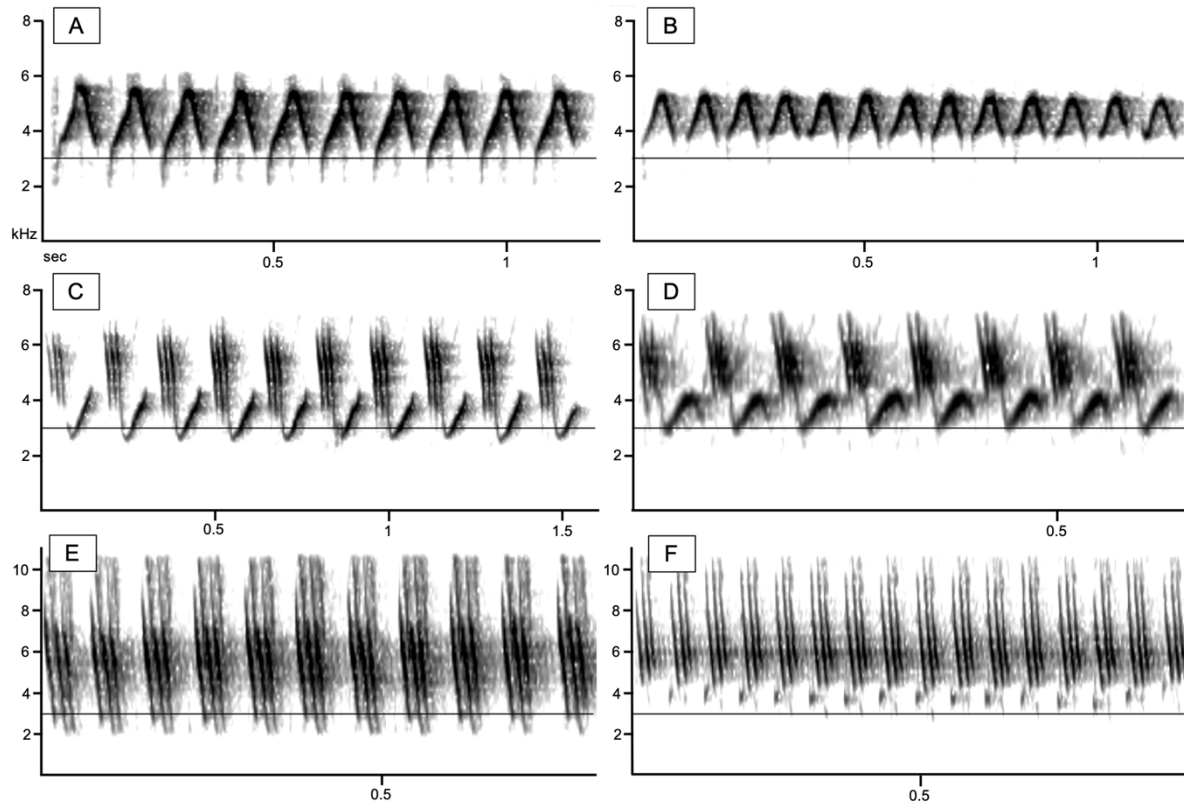

611

612

613

614

615

616

617

618

619

620

621 **Figure 2**

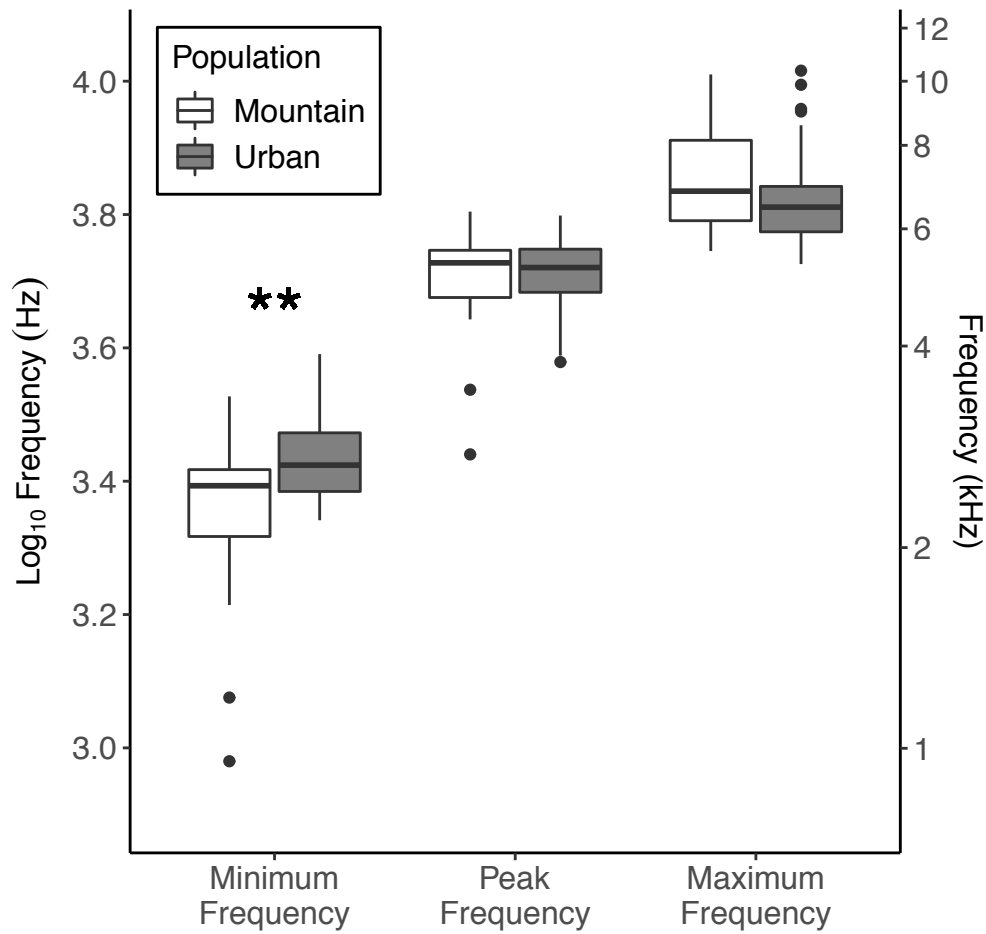

622

623

624

625

626

627

628

629

630 **Figure 3A**

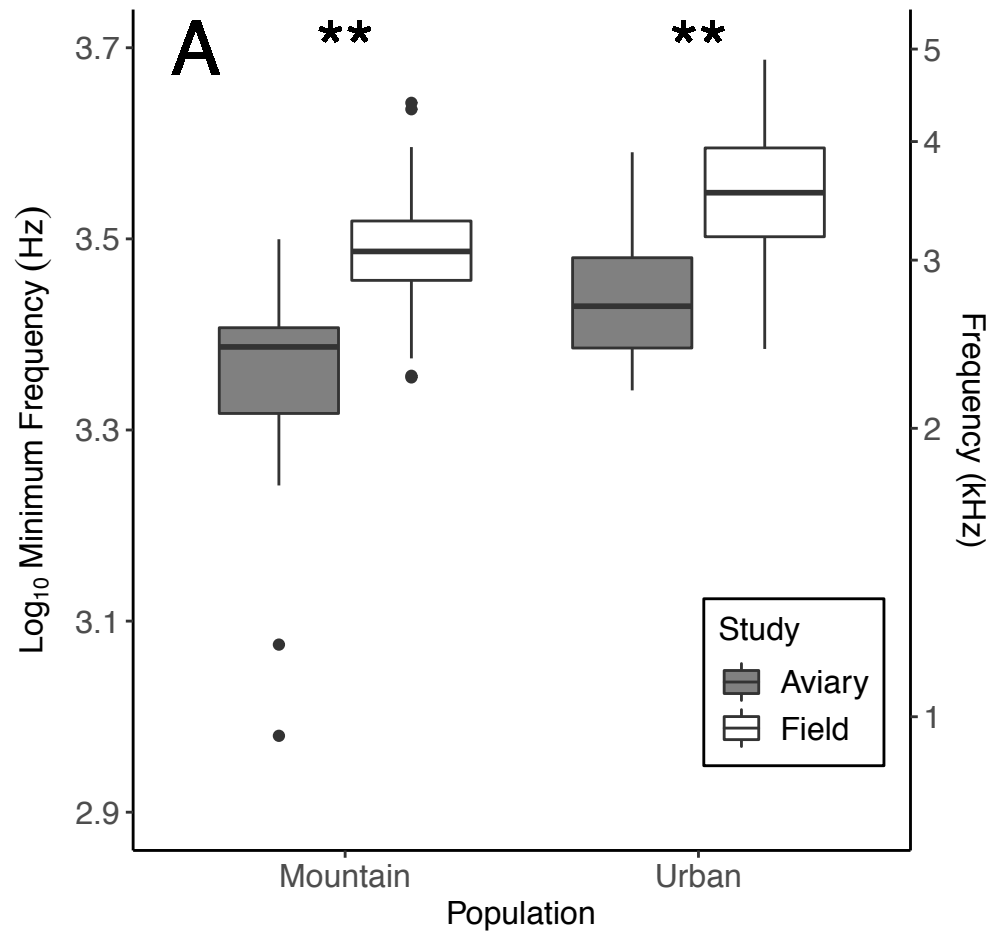

631

632

633

634

635

636

637

638

639 **Figure 3B**

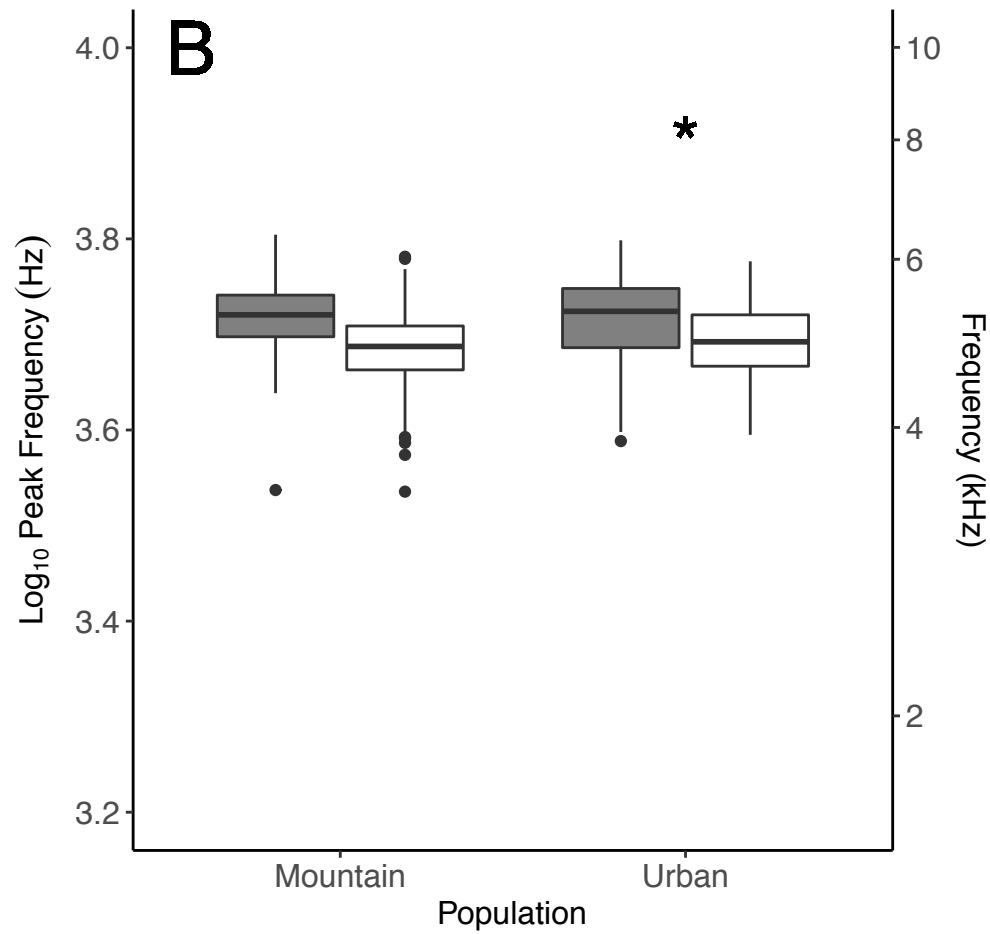

640

641

642

643

644

645

646

647

648 **Figure 3C**

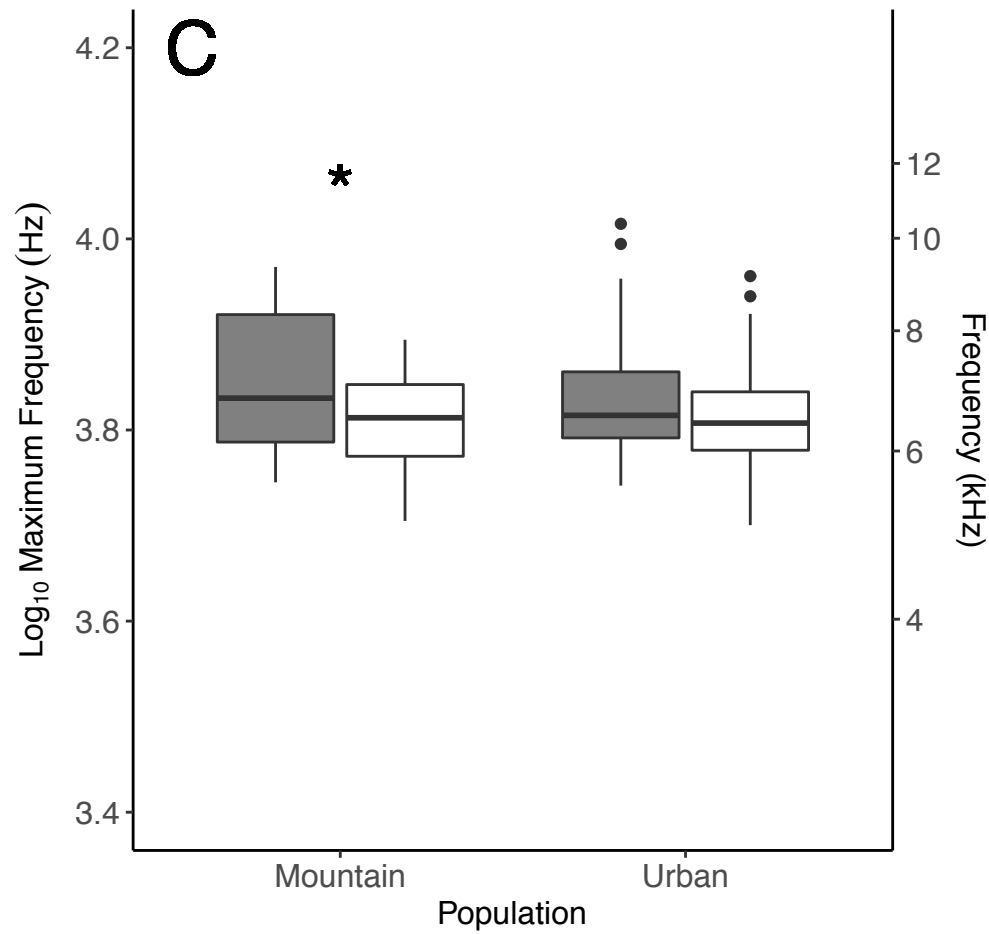

649

650

651

652

653

654

655

656



657 **Supplementary Tables**

658

659 **Table S1.** Results of linear mixed model analyses comparing frequency characteristics  
660 between common garden populations measured from power spectra, rather than from  
661 spectrograms, using song type as a random effect.

| Song Measurement  | Estimate | <i>t</i> | <i>P</i> -value  | N  |
|-------------------|----------|----------|------------------|----|
| Minimum Frequency | 0.081    | 4.528    | <b>&lt;0.001</b> | 64 |
| Maximum Frequency | -0.001   | -0.083   | 0.934            | 55 |

662

663 **Table S2.** Results of linear mixed model analyses comparing frequency characteristics  
664 between common garden populations measured from spectrograms using individual as  
665 a random effect rather than song type.

| Song Measurement  | Estimate | <i>t</i> | <i>P</i> -value | N  |
|-------------------|----------|----------|-----------------|----|
| Minimum Frequency | 0.095    | 3.011    | <b>0.003</b>    | 65 |
| Maximum Frequency | -0.025   | -1.437   | 0.151           | 65 |
| Peak Frequency    | 0.012    | 0.429    | 0.668           | 65 |

666

667

668 **Table S3.** Results of linear mixed model analyses comparing frequency characteristics  
669 between common garden populations measured from power spectra, rather than from  
670 spectrograms, using individual as a random effect rather than song type.

| Song Measurement  | Estimate | <i>t</i> | <i>P</i> -value | N  |
|-------------------|----------|----------|-----------------|----|
| Minimum Frequency | 0.078    | 2.123    | <b>0.034</b>    | 64 |
| Maximum Frequency | -0.013   | -0.722   | 0.471           | 55 |

671

672

673

674

675

676

677

678

679

680

681

682

683

684

685 **Figure S1.** Correlation of (A) minimum and (B) maximum frequencies measured visually  
686 from the spectrogram and using a minus 30 dB threshold from the power spectrum.

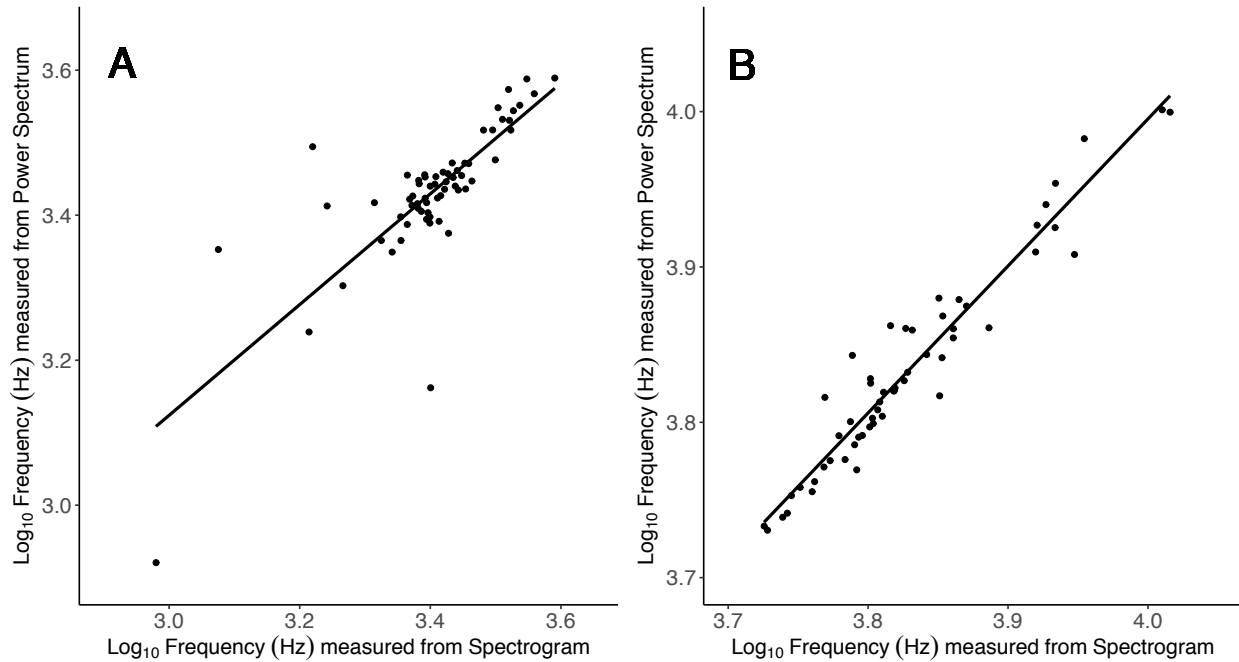

687

688

689

690

691

692

693

694

695

696

697 **Figure S2.** Comparison of the spectrogram and power spectrum techniques for  
698 measuring minimum and maximum frequency of songs recorded in the common garden  
699 environment. Each box represents the interquartile range and median, whiskers  
700 represent range of data within 1.5 times the interquartile range, and dots represent data  
701 points exceeding that range. **\*\* $P < 0.001$**

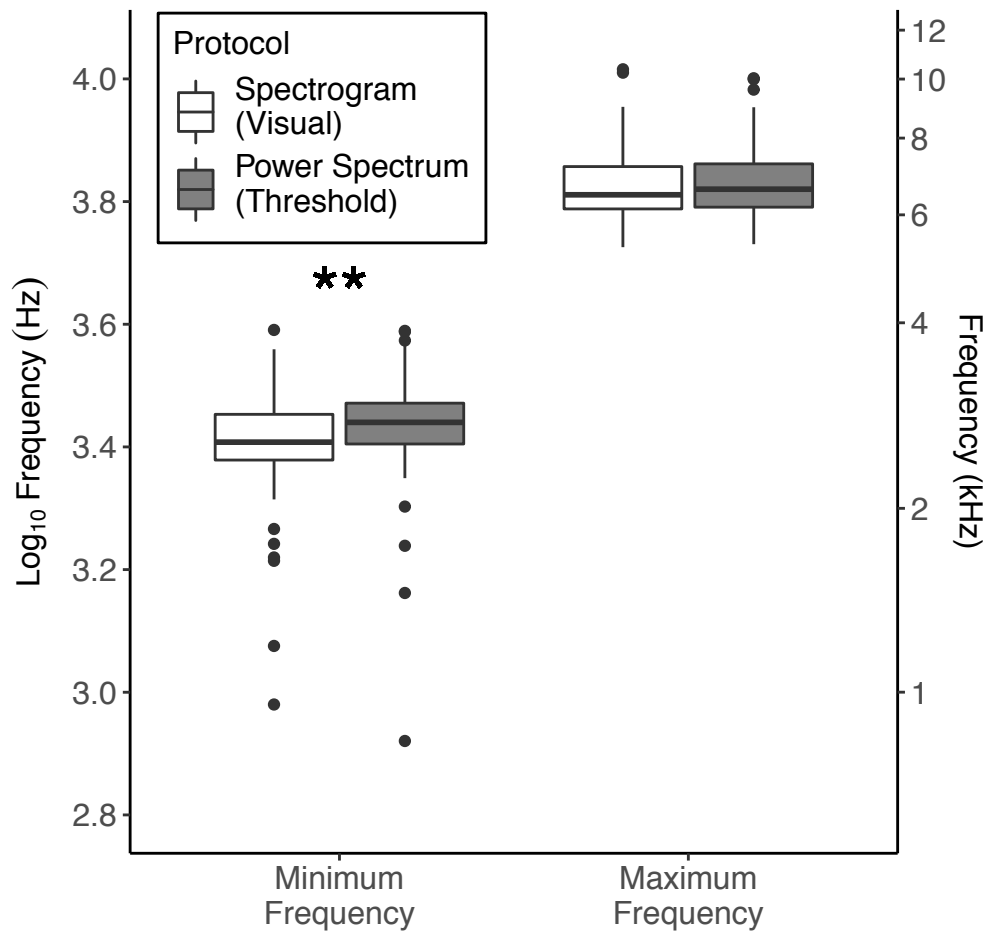

702

703

704

705

706
